# Supplementary figures and images for: Thermal lens detection device
Source: Royal Society of Chemistry journal article supplement (doi:10.1039/c1lc20175a), 2011-01-01

# Supplementary information

*K.Mawatari et al.*

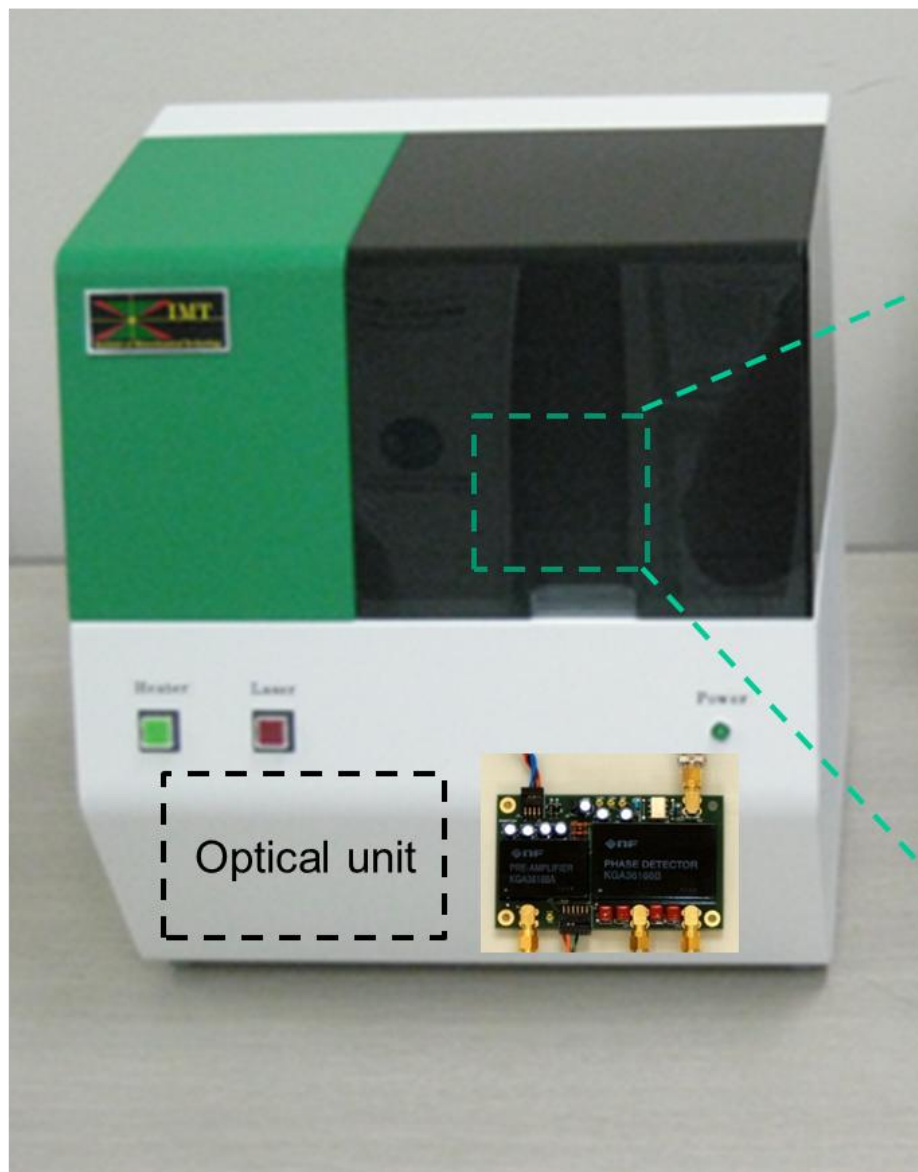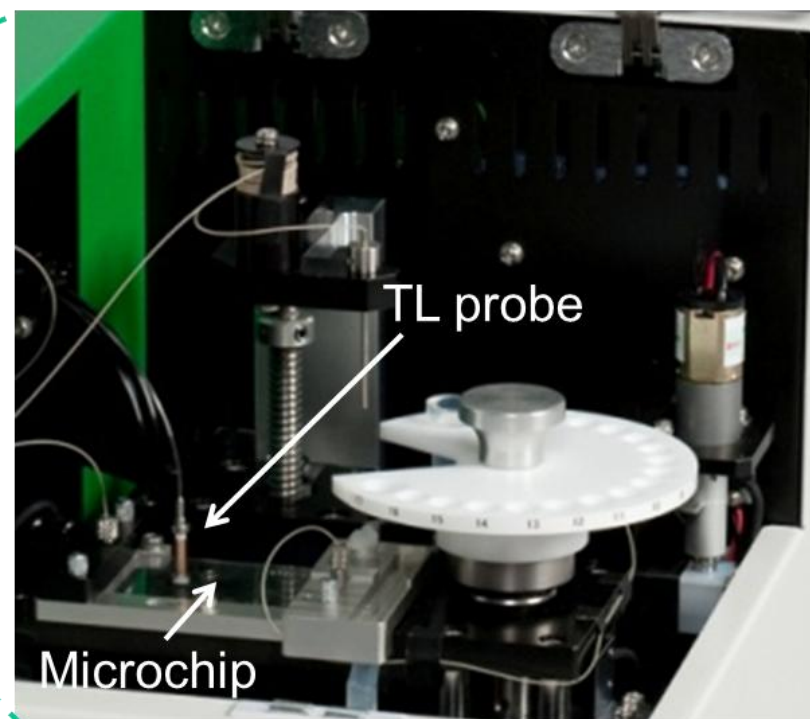

Supplement: c1lc20175a.pdf [file c1lc20175a.pdf]
